# Supplementary material for: Cardiac outcomes of subjects on adjuvant trastuzumab emtansine vs paclitaxel in combination with trastuzumab for stage I HER2-positive breast cancer (ATEMPT) study (TBCRC033): a randomized controlled trial
Source: PubMed Central journal article supplement (PMC8850608; doi:10.1038/s41523-022-00385-2), 2022-02-16
Supplement: 41523_2022_385_MOESM1_ESM.pdf [file 41523_2022_385_MOESM1_ESM.pdf]

Supplementary Table 1. Summary of LVEF at protocol specified time points\* and changes from baseline values among patients who completed treatment (n=390)

| TH arm                       | Baseline   | 3 months   | 6 months   | 9 months   | 1 year/EOT |
|------------------------------|------------|------------|------------|------------|------------|
| LVEF reduction from baseline |            |            |            |            |            |
| < 10%                        | -          | 86 (89%)   | 81 (84%)   | 84 (87%)   | 84 (87%)   |
| 10-15%                       | -          | 4 (4%)     | 10 (10%)   | 7 (7%)     | 3 (3%)     |
| 10-15% and below LLN         | -          | 0          | 0          | 0          | 0          |
| ≥ 16%                        | -          | 0          | 1 (1%)     | 0          | 0          |
| Not performed                | -          | 7 (7%)     | 5 (5%)     | 6 (6%)     | 7 (7%)     |
| Not applicable               | -          | 0          | 0          | 0          | 0          |
| LVEF level (%)               |            |            |            |            |            |
| Median (IQR range)           | 60 [62-65] | 60 [62-65] | 60 [60-65] | 59 [60-65] | 60 [62-65] |
| T-DM1 arm                    | Baseline   | 3 months   | 6 months   | 9 months   | 1 year/EOT |
| LVEF reduction from baseline |            |            |            |            |            |
| < 10%                        | -          | 265 (90%)  | 272 (93%)  | 264 (90%)  | 235 (80%)  |
| 10-15%                       | -          | 15 (5%)    | 13 (3%)    | 10 (3%)    | 10 (3%)    |
| 10-15% and below LLN         | -          | 0          | 0          | 0          | 0          |
| ≥ 16%                        | -          | 0          | 1 (0%)     | 0          | 1 (0%)     |
| Not performed                | -          | 13 (4%)    | 11 (4%)    | 19 (6%)    | 37 (13%)   |
| Not applicable               | -          | 0          | 0          | 0          | 0          |
| LVEF level (%)               |            |            |            |            |            |
| Median (IQR range)           | 60 [62-65] | 60 [62-65] | 60 [62-65] | 60 [63-66] | 60 [63-67] |

EOT, end of treatment; IQR, intraquartile range; LLN, lower limit of normal; LVEF, left ventricular ejection fraction; T-DM1, trastuzumab emtansine; TH, paclitaxel with trastuzumab.

\*Each timepoint uses a window of 6 weeks. If more than one cardiac assessment falls into each window, the worst assessment is used.
